# Supplementary material for: A Genome-Wide mRNA Screen and Functional Analysis Reveal FOXO3 as a Candidate Gene for Chicken Growth
Source: PLoS One. 2015 Sep 14;10(9):e0137087. doi: 10.1371/journal.pone.0137087 (PMC4569328; doi:10.1371/journal.pone.0137087)
Supplement: S3 Table — (XLS) [file pone.0137087.s007.xls]

## Sheet: WRRh Vs. XHh and WRRl Vs. XHl
Gene ID	Gene name	Locus	WRRh-FPKM	XHh-FPKM	log2Ratio(XHh/WRRh)	P value	Q value	WRRl-FPKM	XHl-FPKM	log2Ratio(XHl/WRRl)	P value	Q value	Description
ENSGALG00000019430	LOC420301	2:154039967-154045197	66.8468	0.303292	-7.78401	2.09e-13	1.99e-10	267.446	0.428402	-9.28607	0	0	lymphocyte antigen 6 complex, locus E-like
ENSGALG00000010926	SPP1	4:47107502-47110531	32.6184	0.545525	-5.9019	1.15e-10	5.22e-08	376.692	0.618946	-9.24936	0	0	secreted phosphoprotein 1
ENSGALG00000023370	-	15:8190794-8191130	75.5244	1.35036	-5.80553	1.05e-07	1.9e-05	84.4907	3.08929	-4.77344	6.04e-09	1.54e-06
ENSGALG00000021139	LAC_CHICK	15:8172120-8189728	556.257	26.3329	-4.40082	6.35e-14	8.22e-11	1997.31	84.7799	-4.55819	0	0	Ig lambda chain V-1 region
ENSGALG00000014412	CSTA	1:79869340-79874307	103.322	6.23718	-4.05011	3.62e-08	7.46e-06	426.268	7.09412	-5.90899	0	0	Cystatin A (stefin A)
ENSGALG00000005937	-	15:8172120-8189728	35.9637	2.32119	-3.9536	0.000416979	0.0182044	154.9	8.79625	-4.13831	4.48e-09	1.18e-06
ENSGALG00000012173	LGALS3	5:58849091-58851410	26.8585	1.7644	-3.92813	4.92e-09	1.29e-06	102.356	2.56878	-5.31636	0	0	Lectin, galactoside-binding, soluble, 3
ENSGALG00000006579	PLIN1	10:14521304-14522813	14.5179	1.30202	-3.479	0.00038737	0.0173293	10.702	0.582509	-4.19946	3.98e-05	0.00284437	perilipin 1
ENSGALG00000003323	OSGIN1	11:2583527-2595503	75.296	8.83444	-3.09136	3.08e-10	1.16e-07	51.5348	6.29608	-3.03302	8.78e-11	4.05e-08	Oxidative stress induced growth inhibitor 1
ENSGALG00000008367	MDK	5:25801507-25803536	9.07652	1.11504	-3.02504	0.000842341	0.0317288	30.0209	3.57586	-3.06961	1.06e-07	1.9e-05	midkine (neurite growth-promoting factor 2)
ENSGALG00000006894	PLTP	20:10491965-10496062	10.4236	1.37258	-2.92489	1.77e-05	0.00146805	25.0136	2.15957	-3.5339	2.12e-10	8.35e-08	phospholipid transfer protein
ENSGALG00000014585	CCLI10	19:4763533-4764614	55.802	8.47873	-2.7184	5.71e-06	0.000541324	209.568	15.974	-3.71362	9.55e-15	1.57e-11	chemokine
ENSGALG00000013035	SBK2	2:80478955-80480913	48.6194	7.78712	-2.64237	2.26e-06	0.000249954	31.5845	5.58493	-2.4996	7.07e-06	0.000644072	SH3 domain binding kinase family, member 2
ENSGALG00000017527	-	Z:6684982-6688899	11.4232	1.98669	-2.52354	0.000922712	0.0340723	25.2653	5.05585	-2.32113	6.51e-05	0.00417981
ENSGALG00000012458	C1QTNF6	1:53373023-53508544	13.7633	2.49821	-2.46186	0.000579444	0.0235126	12.3732	2.60511	-2.2478	0.000894344	0.0332384	C1q and tumor necrosis factor related protein 6
ENSGALG00000007418	CD3D	24:5602401-5604890	37.431	6.83645	-2.45291	4.44e-05	0.00312106	67.9638	13.1706	-2.36745	7.2e-07	9.35e-05	CD3d molecule, delta (CD3-TCR complex)
ENSGALG00000011803	EMP1	1:50204483-50219284	21.9157	4.21906	-2.37697	0.000283381	0.0134759	25.6079	4.77035	-2.42442	3.9e-05	0.00280603	epithelial membrane protein 1
ENSGALG00000002549	RGS1	8:3635377-3638784	10.8852	2.09947	-2.37427	0.00095956	0.0351929	28.2357	1.62959	-4.11494	2e-10	7.96e-08	Regulator of G-protein signaling 1
ENSGALG00000006715	OAF	24:3865268-3877689	24.2658	4.74206	-2.35534	6.46e-06	0.000600039	31.2995	6.20724	-2.33412	2.11e-07	3.4e-05	OAF homolog (Drosophila)
ENSGALG00000011663	FNDC1	3:47664072-47702596	20.6107	4.25046	-2.2777	4.57e-07	6.44e-05	32.3333	5.37492	-2.58871	4.74e-10	1.67e-07	Fibronectin type III domain containing 1
ENSGALG00000002112	CSF3R	23:4327783-4332753	10.3891	2.21071	-2.23249	0.000224885	0.0112939	30.4533	4.27407	-2.83292	4.96e-10	1.73e-07	Granulocyte colony-stimulating factor receptor
ENSGALG00000007511	ITGB2	7:7142971-7154558	22.7309	5.15806	-2.13975	3.88e-06	0.000395077	56.1643	7.24682	-2.95423	2.01e-12	1.43e-09	integrin, beta 2
ENSGALG00000009470	SERPINI1	9:22117945-22156946	11.0922	2.52736	-2.13384	0.000406449	0.0178522	46.7159	2.31176	-4.33685	6.66e-16	1.51e-12	serpin peptidase inhibitor, clade I (neuroserpin), member 1
ENSGALG00000006751	THY1	24:4207540-4210104	28.1947	6.64641	-2.08478	6.3e-06	0.000591358	59.3049	8.08297	-2.87519	4.45e-12	2.88e-09	Thy-1 cell surface antigen
ENSGALG00000014201	PARVB	1:71295722-71352003	23.5551	5.6198	-2.06745	8.9e-05	0.00537275	28.3912	6.6423	-2.09569	6.34e-06	0.000592205	Parvin, beta
ENSGALG00000007416	CD3E	24:5595447-5600351	17.2201	4.26812	-2.01242	0.000214559	0.010889	34.2106	6.13343	-2.47968	5.02e-08	9.72e-06	CD3e molecule, epsilon (CD3-TCR complex)
ENSGALG00000007582	DPYSL3	13:18592761-18623898	21.1272	5.31723	-1.99035	1.55e-05	0.00130134	32.6576	5.29455	-2.62484	2.86e-10	1.09e-07	dihydropyrimidinase-like 3
ENSGALG00000012420	LGALS1	1:53130080-53133213	174.529	45.71	-1.93288	4.53e-05	0.00317847	328.179	37.2768	-3.13813	1.47e-12	1.15e-09	lectin, galactoside-binding, soluble, 1
ENSGALG00000021569	C1QA	21:6268873-6276623	27.891	7.41133	-1.912	0.00138197	0.0464538	52.54	9.62375	-2.44875	1.18e-06	0.000142039	Complement component 1, q subcomponent, A chain
ENSGALG00000010770	SCIN	2:26728867-26777421	18.4829	5.04249	-1.87398	3.25e-05	0.00239314	50.3283	4.48614	-3.48782	0	0	scinderin
ENSGALG00000006265	Q6T7B9_CHICK	6:19994294-20222752	40.2713	11.0619	-1.86416	0.00024385	0.0119894	51.122	11.0255	-2.2131	1.47e-06	0.000171892
ENSGALG00000006378	LIPA	6:20421966-20432759	38.7582	10.9495	-1.82364	0.00020581	0.0105784	125.025	12.8819	-3.2788	4.66e-15	8.05e-12	Lipase A, lysosomal acid, cholesterol esterase
ENSGALG00000013447	TRDC	27:138519-141109	30.4844	8.72559	-1.80475	0.000852916	0.0320604	38.7409	11.5836	-1.74177	0.000186585	0.00985582	T cell receptor delta constant
ENSGALG00000015469	IGSF3	1:95504776-95586161	14.103	4.22523	-1.7389	0.000261305	0.0126755	15.5868	3.98948	-1.96605	6.55e-06	0.00060585	Immunoglobulin superfamily, member 3
ENSGALG00000003283	COMP	28:2889956-2905292	131.039	39.9615	-1.71332	8.46e-05	0.00516926	201.563	69.1885	-1.54263	0.000854418	0.0320673	Cartilage oligomeric matrix protein
ENSGALG00000000166	DMB2	16:53371-56399	33.2794	10.4153	-1.67592	0.00114418	0.0402875	43.7286	15.9992	-1.45057	0.00147914	0.0486623	Major histocompatibility complex class II beta chain BMA2
ENSGALG00000000562	LAPTM5	23:241267-255608	66.4779	20.9321	-1.66716	9.5e-05	0.00564525	144.999	29.1331	-2.31531	2.47e-08	5.29e-06	Lysosomal protein transmembrane 5
ENSGALG00000023622	AVD	Z:8485801-8502414	77.7675	24.7072	-1.65424	0.00114572	0.0402875	610.526	25.9531	-4.55607	0	0	avidin
ENSGALG00000017185	TMEM123	1:186896581-186913663	14.6559	4.75286	-1.62462	0.00129446	0.0445028	41.405	5.86351	-2.81997	2.81e-11	1.43e-08	transmembrane protein 123
ENSGALG00000005638	IL2RG	4:2374516-2377287	23.2553	7.72175	-1.59056	0.00110011	0.0393085	68.3674	9.57953	-2.83528	2.84e-11	1.43e-08	Interleukin 2 receptor, gamma
ENSGALG00000005292	KBTBD5	2:1907495-1916552	61.2053	20.4146	-1.58405	0.000140207	0.00776839	68.1607	20.3852	-1.74142	2.3e-05	0.00179398	Kelch-like family member 40
ENSGALG00000017247	PRCP	1:193357405-193398157	21.2765	7.21994	-1.5592	0.000516022	0.0213698	31.6708	10.0244	-1.65964	8.82e-06	0.000793452	Prolylcarboxypeptidase (angiotensinase C)
ENSGALG00000008044	CD82	5:24004509-24049140	28.3797	9.67603	-1.55237	0.000282244	0.0134394	47.7688	9.88992	-2.27204	3.55e-08	7.36e-06	CD82 molecule
ENSGALG00000003015	SERPINF1	19:5381629-5385853	265.258	94.5532	-1.4882	0.000633268	0.0252158	303.519	98.9473	-1.61706	0.000269355	0.0129448	serpin peptidase inhibitor, clade F
ENSGALG00000009594	RARRES1	9:23996272-24003889	65.6805	23.7808	-1.46567	0.000546455	0.0224251	84.1705	28.3583	-1.56954	6.36e-05	0.00410603	retinoic acid receptor responder (tazarotene induced) 1
ENSGALG00000008676	RRBP1	3:16438956-16456676	22.8187	8.32927	-1.45395	9.02e-05	0.00543181	27.7607	9.26958	-1.58247	1.72e-06	0.0001982	ribosome binding protein 1 homolog 180kDa (dog)
ENSGALG00000003770	ANXA2	10:6040843-6063439	164.164	60.9518	-1.4294	0.000649056	0.0256201	250.167	53.4166	-2.22753	1.9e-07	3.11e-05	annexin A2
ENSGALG00000007594	ASB12	4:11747270-11749336	92.1868	34.314	-1.42576	0.000701765	0.0273138	53.9233	19.9793	-1.43241	0.000666559	0.0261684	ankyrin repeat and SOCS box containing 12
ENSGALG00000003196	ANG	6:10376969-10386988	116.233	43.5427	-1.41651	5.93e-05	0.00386562	276.234	77.5175	-1.8333	7.02e-09	1.75e-06	angiogenin, ribonuclease, RNase A family, 5
ENSGALG00000015148	ANXA1	Z:35727593-35745308	53.9097	20.518	-1.39365	0.00107591	0.0386006	95.5698	18.7566	-2.34916	8.32e-09	2.05e-06	annexin A1
ENSGALG00000017239	CTSC	1:192535037-192550591	92.7064	36.3898	-1.34914	0.00110215	0.0393085	198.169	46.9741	-2.07679	1.04e-06	0.00012869	Cathepsin C
ENSGALG00000002192	PTPRC	8:2034559-2092242	18.0924	7.27316	-1.31473	0.000154843	0.00846286	39.7918	9.65291	-2.04344	9.99e-14	1.1e-10	protein tyrosine phosphatase, receptor type, C
ENSGALG00000017046	POSTN	1:176288240-176321488	187.562	79.5248	-1.23789	0.000195842	0.0102256	248.922	74.4011	-1.7423	6.75e-08	1.27e-05	periostin, osteoblast specific factor
ENSGALG00000006025	XIRP1	2:4875085-4896377	30.2832	13.0541	-1.21402	0.000999685	0.0362246	43.0857	10.6638	-2.01448	5.75e-08	1.1e-05	xin actin-binding repeat containing 1
ENSGALG00000011885	ANXA5	4:55512553-55535007	122.633	58.2852	-1.07314	0.000643775	0.0254393	156.51	55.5455	-1.49452	1.24e-06	0.000148786	annexin A5
ENSGALG00000015935	SMYD1	4:89131776-89154132	131.597	286.315	1.12148	0.000462256	0.01966	127.933	265.356	1.05254	0.00120247	0.0418968	SET and MYND domain containing 1
ENSGALG00000008593	AT1B4	4:16570194-16602074	195.071	430.878	1.14328	0.000452503	0.0193908	209.14	614.878	1.55583	2.21e-05	0.00174294	ATPase, Na+/K+ transporting, beta 4 polypeptide
ENSGALG00000006216	MYOD1	5:13282610-13286567	118.89	277.56	1.22318	0.000534361	0.0220537	112.648	313.633	1.47725	0.000144019	0.00794319	myogenic differentiation 1
ENSGALG00000020876	AOX2P	7:12298759-12341448	12.9948	30.7638	1.24331	0.000637691	0.0252752	7.85516	42.5124	2.43617	2.78e-10	1.08e-07	aldehyde oxidase 2 pseudogene
ENSGALG00000021697	CEP85	23:196625-207786	14.2081	38.9858	1.45624	0.000401743	0.0177099	14.0722	53.688	1.93176	6.91e-06	0.000632393	Centrosomal protein 85kDa
ENSGALG00000008088	ACSL4	4:13863905-13898843	10.076	28.8458	1.51744	0.000340643	0.015605	11.1629	29.878	1.42037	0.000994885	0.0360867	Acyl-CoA synthetase long-chain family member 4
ENSGALG00000008185	AOX1	7:12258382-12294638	20.5935	59.2321	1.52419	0.000291206	0.0137829	26.93	75.4194	1.48572	0.00080135	0.0304698	aldehyde oxidase 1
ENSGALG00000019867	C2orf44	3:107038800-107046427	5.4994	16.7504	1.60685	0.000512	0.0212762	6.07687	19.3996	1.67463	0.000327164	0.0151021	Chromosome 2 open reading frame 44
ENSGALG00000009572	ADAMTS20	1:31707791-31779739	3.5552	12.5682	1.82177	4.03e-05	0.00287557	3.89489	15.2067	1.96505	1.52e-05	0.0012898	ADAM metallopeptidase with thrombospondin type 1 motif, 20
ENSGALG00000011537	PDE10A	3:45146990-45196766	9.40564	33.546	1.83454	3.13e-05	0.0023174	16.4105	43.5309	1.40742	0.000923363	0.0340723	Phosphodiesterase 10A
ENSGALG00000008522	CHAC1	5:26595605-26596541	74.4349	276.605	1.89378	4.99e-06	0.000490465	42.3166	408.798	3.27209	1.31e-12	1.06e-09	ChaC, cation transport regulator homolog 1 (E. coli)
ENSGALG00000010785	ACOT11	8:25982996-25992915	7.73936	32.984	2.09148	3.49e-06	0.000364668	9.29472	30.3656	1.70795	0.000159432	0.00866634	Acyl-CoA thioesterase 11
ENSGALG00000000710	RNF207	21:593223-597980	9.15021	39.0351	2.0929	2.01e-07	3.26e-05	14.6231	42.5507	1.54093	4.2e-05	0.00296652	Ring finger protein 207
ENSGALG00000014569	PNPLA2	5:16838220-16868613	21.3688	92.7455	2.11777	4.07e-07	5.97e-05	43.513	131.926	1.60021	0.000200229	0.0103798	patatin-like phospholipase domain containing 2
ENSGALG00000002519	SLC25A33	21:3385628-3404551	3.8114	19.7835	2.37591	5.29e-05	0.00356465	8.20857	25.9044	1.65799	0.00118963	0.0416094	Solute carrier family 25, member 33
ENSGALG00000009505	PNPLA8	1:30303462-30338086	13.8272	73.4218	2.4087	1.18e-08	2.75e-06	15.8372	63.336	1.99971	3.5e-06	0.000364668	patatin-like phospholipase domain containing 8
ENSGALG00000012960	FAM134B	2:77364776-77426979	40.4053	244.745	2.59866	9.96e-10	3.25e-07	56.8514	191.029	1.74852	5.33e-05	0.00357802	family with sequence similarity 134, member B
ENSGALG00000016368	KLHL38	2:143748478-143753282	4.81806	30.0731	2.64195	3.71e-07	5.53e-05	2.9877	33.8805	3.50335	1.47e-09	4.66e-07	Kelch-like family member 38
ENSGALG00000015297	FOXO3	3:69947182-70018373	14.1291	92.6695	2.71342	6.8e-10	2.34e-07	30.761	90.8891	1.563	0.000224454	0.0112939	Forkhead box O3
ENSGALG00000023744	-	8:5929459-5936023	32.8054	247.413	2.91491	1.89e-11	1.06e-08	41.0381	188.742	2.20138	4.72e-07	6.57e-05
ENSGALG00000003678	GLUL	8:5929459-5936023	32.8856	261.051	2.98881	3.9e-11	1.91e-08	49.4956	244.468	2.30427	1.28e-06	0.000152283	Glutamine synthetase
ENSGALG00000016369	FBXO32	2:143695681-143720333	23.9379	208.695	3.12403	2.29e-11	1.22e-08	21.5189	235.928	3.45467	1.99e-12	1.43e-09	F-box protein 32
ENSGALG00000015147	ALDH1A1	Z:35596867-35631785	5.44877	51.4399	3.23888	3.43e-12	2.35e-09	7.93072	27.282	1.78242	8.55e-05	0.00520938	aldehyde dehydrogenase 1 family, member A1
ENSGALG00000005043	ACACB	15:6815953-6842375	1.47162	14.6996	3.3203	2.76e-07	4.29e-05	4.30143	28.4513	2.72561	1.75e-12	1.32e-09	Acetyl-CoA carboxylase beta
ENSGALG00000009700	PDK4	2:23867911-23874843	18.955	264.634	3.80335	0	0	87.1239	513.958	2.56051	4.76e-08	9.32e-06	pyruvate dehydrogenase kinase, isozyme 4
ENSGALG00000019454	-	2:127498779-127510389	1.88013	55.6601	4.88774	3.18e-12	2.22e-09	9.68168	47.7263	2.30145	2.61e-05	0.00201108
ENSGALG00000001626	UTS2R	18:3636160-3637309	0.742415	28.8223	5.27882	6.01e-11	2.9e-08	0.878215	19.5021	4.47291	2.5e-08	5.34e-06	Urotensin 2 receptor
ENSGALG00000016330	ANGPT2	3:91368458-91490553	13.222	0	-1.79769e+308	1.96e-08	4.25e-06	10.7183	0	-1.79769e+308	5.62e-07	7.62e-05	Angiopoietin-2
ENSGALG00000017184	MMP7	1:186865325-186869665	42.92	0	-1.79769e+308	8.79e-07	0.000111366	145.404	0.0869317	-10.7079	3.38e-13	2.99e-10	matrix metallopeptidase 7 (matrilysin, uterine)
